# Supplementary material
Source: publisher figshare collection journal article supplement (https://acs.figshare.com/ndownloader/files/4036417)
Supplement: Supplementary file 1 [file 4036417]

 
data_koss12 
 
_audit_creation_method            SHELXL-97 
_chemical_name_systematic 
; 
 ? 
; 
_chemical_name_common             Bromine hydrate 
_chemical_melting_point           ? 
_chemical_formula_moiety          ? 
_chemical_formula_sum 
 'H344 Br38.27 O172' 
_chemical_formula_weight          6156.91 
 
loop_ 
 _atom_type_symbol 
 _atom_type_description 
 _atom_type_scat_dispersion_real 
 _atom_type_scat_dispersion_imag 
 _atom_type_scat_source 
 'O'  'O'   0.0106   0.0060 
 'International Tables Vol C Tables 4.2.6.8 and 6.1.1.4' 
 'H'  'H'   0.0000   0.0000 
 'International Tables Vol C Tables 4.2.6.8 and 6.1.1.4' 
 'Br'  'Br'  -0.2901   2.4595 
 'International Tables Vol C Tables 4.2.6.8 and 6.1.1.4' 
 
_symmetry_cell_setting            tetragonal 
_symmetry_space_group_name_H-M    P4(2)/mnm 
 
loop_ 
 _symmetry_equiv_pos_as_xyz 
 'x, y, z' 
 '-x, -y, z' 
 '-y+1/2, x+1/2, z+1/2' 
 'y+1/2, -x+1/2, z+1/2' 
 '-x+1/2, y+1/2, -z+1/2' 
 'x+1/2, -y+1/2, -z+1/2' 
 'y, x, -z' 
 '-y, -x, -z' 
 '-x, -y, -z' 
 'x, y, -z' 
 'y-1/2, -x-1/2, -z-1/2' 
 '-y-1/2, x-1/2, -z-1/2' 
 'x-1/2, -y-1/2, z-1/2' 
 '-x-1/2, y-1/2, z-1/2' 
 '-y, -x, z' 
 'y, x, z' 
 
_cell_length_a                    23.0436(9) 
_cell_length_b                    23.0436(9) 
_cell_length_c                    12.0745(7) 
_cell_angle_alpha                 90.00 
_cell_angle_beta                  90.00 
_cell_angle_gamma                 90.00 
_cell_volume                      6411.7(5) 
_cell_formula_units_Z             1 
_cell_measurement_temperature     173.0(1) 
_cell_measurement_reflns_used     ? 
_cell_measurement_theta_min       ? 
_cell_measurement_theta_max       ? 
 
_exptl_crystal_description        block 
_exptl_crystal_colour             brown 
_exptl_crystal_size_max           0.40 
_exptl_crystal_size_mid           0.35 
_exptl_crystal_size_min           0.25 
_exptl_crystal_density_meas       ? 
_exptl_crystal_density_diffrn     1.595 
_exptl_crystal_density_method     'not measured' 
_exptl_crystal_F_000              3059 
_exptl_absorpt_coefficient_mu     6.059 
_exptl_absorpt_correction_type    multi-scan 
_exptl_absorpt_correction_T_min   0.1955 
_exptl_absorpt_correction_T_max   0.3127 
_exptl_absorpt_process_details    sadabs 
 
_exptl_special_details 
; 
 ? 
; 
 
_diffrn_ambient_temperature       173.0(1) 
_diffrn_radiation_wavelength      0.71073 
_diffrn_radiation_type            MoK\a 
_diffrn_radiation_source          'fine-focus sealed tube' 
_diffrn_radiation_monochromator   graphite 
_diffrn_measurement_device_type   'Bruker Smart 1000 CCD' 
_diffrn_measurement_method        '\w scans' 
_diffrn_detector_area_resol_mean  ? 
_diffrn_standards_number          0 
_diffrn_standards_interval_count  ? 
_diffrn_standards_interval_time   ? 
_diffrn_standards_decay_%         ? 
_diffrn_reflns_number             24788 
_diffrn_reflns_av_R_equivalents   0.0535 
_diffrn_reflns_av_sigmaI/netI     0.0268 
_diffrn_reflns_limit_h_min        -13 
_diffrn_reflns_limit_h_max        25 
_diffrn_reflns_limit_k_min        -25 
_diffrn_reflns_limit_k_max        25 
_diffrn_reflns_limit_l_min        -13 
_diffrn_reflns_limit_l_max        12 
_diffrn_reflns_theta_min          1.25 
_diffrn_reflns_theta_max          23.30 
_reflns_number_total              2549 
_reflns_number_gt                 1868 
_reflns_threshold_expression      >2sigma(I) 
 
_computing_data_collection        'SMART (Bruker 2003)' 
_computing_cell_refinement        'SAINT (Bruker, 2003)' 
_computing_data_reduction         'SAINT (Bruker, 2003)' 
_computing_structure_solution     'SHELXS-97 (Sheldrick, 1990)' 
_computing_structure_refinement   'SHELXL-97 (Sheldrick, 1997)' 
_computing_molecular_graphics     'ATOMS V.5.0' 
_computing_publication_material   'SHELXL-97 (Sheldrick, 1997)' 
 
_refine_special_details 
; 
 Refinement of F^2^ against ALL reflections.  The weighted R-factor wR and 
 goodness of fit S are based on F^2^, conventional R-factors R are based 
 on F, with F set to zero for negative F^2^. The threshold expression of 
 F^2^ > 2sigma(F^2^) is used only for calculating R-factors(gt) etc. and is 
 not relevant to the choice of reflections for refinement.  R-factors based 
 on F^2^ are statistically about twice as large as those based on F, and R- 
 factors based on ALL data will be even larger. 
; 
 
_refine_ls_structure_factor_coef  Fsqd  
_refine_ls_matrix_type            full 
_refine_ls_weighting_scheme       calc  
_refine_ls_weighting_details 
 'calc w=1/[\s^2^(Fo^2^)+(0.0283P)^2^+4.4023P] where P=(Fo^2^+2Fc^2^)/3' 
_atom_sites_solution_primary      direct 
_atom_sites_solution_secondary    difmap 
_atom_sites_solution_hydrogens    geom 
_refine_ls_hydrogen_treatment     mixed 
_refine_ls_extinction_method      SHELXL 
_refine_ls_extinction_coef        0.00020(3) 
_refine_ls_extinction_expression 
 'Fc^*^=kFc[1+0.001xFc^2^\l^3^/sin(2\q)]^-1/4^' 
_refine_ls_number_reflns          2549 
_refine_ls_number_parameters      563 
_refine_ls_number_restraints      108 
_refine_ls_R_factor_all           0.0631 
_refine_ls_R_factor_gt            0.0384 
_refine_ls_wR_factor_ref          0.0831 
_refine_ls_wR_factor_gt           0.0740 
_refine_ls_goodness_of_fit_ref    1.167 
_refine_ls_restrained_S_all       1.143 
_refine_ls_shift/su_max           0.035 
_refine_ls_shift/su_mean          0.004 
 
loop_ 
 _atom_site_label 
 _atom_site_type_symbol 
 _atom_site_fract_x 
 _atom_site_fract_y 
 _atom_site_fract_z 
 _atom_site_U_iso_or_equiv 
 _atom_site_adp_type 
 _atom_site_occupancy 
 _atom_site_symmetry_multiplicity 
 _atom_site_calc_flag 
 _atom_site_refinement_flags 
 _atom_site_disorder_assembly 
 _atom_site_disorder_group 
Br1A Br 0.72584(4) 0.30500(4) 0.29605(9) 0.0299(2) Uani 0.1065(2) 1 d PD A -2 
Br1B Br 0.64430(4) 0.31736(5) 0.19235(9) 0.0299(2) Uani 0.1065(2) 1 d PD A -2 
Br2A Br 0.64952(4) 0.34215(4) 0.19681(7) 0.03463(18) Uani 0.1211(1) 1 d PD B -3 
Br2B Br 0.70967(4) 0.29021(5) 0.30840(6) 0.03463(18) Uani 0.2421(3) 2 d SPD B -3 
Br3A Br 0.65392(4) 0.33493(4) 0.17693(7) 0.0323(2) Uani 0.1149(2) 1 d PD C -4 
Br3B Br 0.71529(4) 0.31054(4) 0.31704(9) 0.0323(2) Uani 0.1149(2) 1 d PD C -4 
Br4A Br 0.63784(10) 0.33589(13) 0.2439(3) 0.0511(8) Uani 0.0412(2) 1 d PD D -5 
Br4B Br 0.72543(11) 0.29126(14) 0.2629(3) 0.0511(8) Uani 0.0412(2) 1 d PD D -5 
Br5A Br 0.6947(2) 0.36758(14) 0.2390(5) 0.1404(13) Uani 0.0517(3) 1 d PD E -6 
Br5B Br 0.6683(2) 0.27237(14) 0.2486(5) 0.1404(13) Uani 0.0517(3) 1 d PD E -6 
Br7A Br 0.69823(11) 0.35033(12) 0.1839(2) 0.0464(6) Uani 0.0490(2) 1 d PD F -8 
Br7B Br 0.66288(11) 0.28575(11) 0.3098(2) 0.0464(6) Uani 0.0490(2) 1 d PD F -8 
Br1C Br 0.90968(12) 0.55781(14) 0.0328(3) 0.0473(10) Uani 0.0350(2) 1 d PD G -9 
Br1D Br 0.82919(12) 0.51238(14) -0.0330(3) 0.0473(10) Uani 0.0350(2) 1 d PD G -9 
Br2C Br 0.88809(8) 0.56791(8) 0.06217(15) 0.0294(4) Uani 0.0605(2) 1 d PD H -10 
Br2D Br 0.86763(7) 0.49608(8) -0.06033(15) 0.0294(4) Uani 0.0605(2) 1 d PD H -10 
Br3C Br 0.87857(9) 0.54863(8) 0.08865(15) 0.0404(5) Uani 0.0668(2) 1 d PD I -11 
Br3D Br 0.87219(9) 0.51833(8) -0.08961(15) 0.0404(5) Uani 0.0668(2) 1 d PD I -11 
Br4C Br 0.89706(11) 0.51801(11) 0.0876(2) 0.0442(6) Uani 0.0467(2) 1 d PD J -12 
Br4D Br 0.84435(10) 0.56145(11) -0.04842(19) 0.0442(6) Uani 0.0467(2) 1 d PD J -12 
Br5C Br 0.83760(8) 0.52962(8) -0.05813(15) 0.0362(4) Uani 0.0636(2) 1 d PD K -13 
Br5D Br 0.90669(8) 0.53340(8) 0.07578(16) 0.0362(4) Uani 0.0636(2) 1 d PD K -13 
Br6C Br 0.85423(7) 0.48816(5) -0.01638(13) 0.0454(4) Uani 0.0808(2) 1 d PD L -14 
Br6D Br 0.87811(7) 0.58216(5) 0.01919(11) 0.0454(4) Uani 0.0808(2) 1 d PD L -14 
Br7C Br 0.89905(10) 0.49689(9) -0.04133(17) 0.0395(6) Uani 0.0514(2) 1 d PD M -15 
Br7D Br 0.86165(11) 0.56966(10) 0.0644(2) 0.0395(6) Uani 0.0514(2) 1 d PD M -15 
Br8C Br 0.91370(9) 0.55129(10) 0.04984(18) 0.0438(5) Uani 0.06 1 d PD N -16 
Br8D Br 0.84310(9) 0.50958(10) -0.05453(19) 0.0438(5) Uani 0.06 1 d PD N -16 
Br1E Br -0.35891(7) -0.42786(8) 0.03142(12) 0.0362(4) Uani 0.0628(2) 1 d PD O -17 
Br1F Br -0.41685(8) -0.36745(8) -0.06862(15) 0.0362(4) Uani 0.0628(2) 1 d PD O -17 
Br2E Br -0.41146(11) -0.39263(11) -0.0953(2) 0.0327(8) Uani 0.0373(2) 1 d PD P -18 
Br2F Br -0.38139(11) -0.36355(11) 0.0750(2) 0.0327(8) Uani 0.0373(2) 1 d PD P -18 
Br3E Br -0.43784(14) -0.38785(18) -0.0273(3) 0.0362(10) Uani 0.0266(2) 1 d PDU Q -19 
Br3F Br -0.35467(16) -0.4000(2) 0.0728(4) 0.0362(10) Uani 0.0266(2) 1 d PDU Q -19 
Br4E Br -0.42042(18) -0.4240(2) -0.0648(2) 0.0384(8) Uani 0.0279(1) 1 d PDU R -20 
Br4F Br -0.38500(18) -0.38977(19) 0.0982(2) 0.0384(8) Uani 0.0279(1) 1 d PDU R -20 
Br6E Br -0.35047(10) -0.39761(12) 0.0371(2) 0.0534(7) Uani 0.0543(2) 1 d PD S -22 
Br6F Br -0.43960(9) -0.41635(10) -0.03744(17) 0.0534(7) Uani 0.0543(2) 1 d PD S -22 
Br7E Br -0.34942(11) -0.37633(12) 0.0347(2) 0.0395(7) Uani 0.0382(2) 1 d PD T -23 
Br7F Br -0.42991(13) -0.39919(14) -0.0646(3) 0.0395(7) Uani 0.0382(2) 1 d PD T -23 
O1 O 0.10535(5) 0.27387(5) 0.0000 0.0383(4) Uani 1 2 d SD . . 
H11 H 0.1041(19) 0.2313(4) 0.0000 0.104(15) Uiso 0.50 2 d SPD . . 
H12 H 0.1467(4) 0.2818(10) 0.0000 0.029(8) Uiso 0.50 2 d SPD . . 
H13 H 0.0873(8) 0.2874(9) -0.0684(9) 0.105(11) Uiso 0.50 1 d PD . . 
O2 O 0.04956(3) 0.31702(3) -0.18482(6) 0.0397(2) Uani 1 1 d D . . 
H21 H 0.0148(4) 0.3386(6) -0.1716(18) 0.060 Uiso 0.50 1 d PD . . 
H22 H 0.0313(7) 0.2813(5) -0.2125(17) 0.080(9) Uiso 0.50 1 d PD . . 
H23 H 0.0817(5) 0.3343(7) -0.2261(13) 0.063(8) Uiso 0.50 1 d PD . . 
H24 H 0.0677(7) 0.3033(9) -0.1158(9) 0.080(9) Uiso 0.50 1 d PD . . 
O3 O 0.13388(3) 0.36452(3) -0.31730(6) 0.0387(2) Uani 1 1 d D . . 
H31 H 0.1271(12) 0.4038(4) -0.3425(18) 0.113(11) Uiso 0.50 1 d PD . . 
H32 H 0.1709(4) 0.3694(10) -0.2801(13) 0.070(8) Uiso 0.50 1 d PD . . 
H33 H 0.1396(9) 0.3363(5) -0.3760(9) 0.048(7) Uiso 0.50 1 d PD . . 
H34 H 0.1096(9) 0.3516(9) -0.2764(18) 0.043(7) Uiso 0.50 1 d P . . 
O4 O 0.55460(5) 0.29105(5) 0.0000 0.0374(3) Uani 1 2 d SD . . 
H41 H 0.5675(11) 0.3315(4) 0.0000 0.090(14) Uiso 0.50 2 d SPD . . 
H42 H 0.5816(6) 0.2593(5) 0.0000 0.090(14) Uiso 0.50 2 d SPD . . 
H43 H 0.5265(5) 0.2860(12) 0.0582(10) 0.116(12) Uiso 0.50 1 d PD . . 
O5 O 0.64474(5) 0.20754(5) 0.0000 0.0377(4) Uani 1 2 d SD . . 
H51 H 0.6360(9) 0.1797(5) 0.0575(10) 0.080(9) Uiso 0.50 1 d PD . . 
H52 H 0.6186(6) 0.2411(5) 0.0000 0.120 Uiso 0.50 2 d SPD . . 
H53 H 0.6760(5) 0.2366(6) 0.0000 0.120 Uiso 0.50 2 d SPD . . 
O6 O 0.00325(3) 0.13433(3) 0.18201(6) 0.0385(2) Uani 1 1 d D . . 
H61 H -0.0360(4) 0.1296(11) 0.1515(16) 0.084(9) Uiso 0.50 1 d PD . . 
H62 H 0.0300(6) 0.1124(7) 0.1359(13) 0.125 Uiso 0.50 1 d PD . . 
H63 H 0.0057(10) 0.1663(5) 0.2339(10) 0.049(7) Uiso 0.50 1 d PD . . 
H64 H 0.0114(13) 0.1004(5) 0.2293(13) 0.152(14) Uiso 0.50 1 d PD . . 
O7 O 0.08942(5) 0.08942(5) 0.5000 0.0404(5) Uani 1 4 d SD . . 
H71 H 0.0744(5) 0.0744(5) 0.4301(9) 0.059(10) Uiso 0.50 2 d SPD . . 
H72 H 0.1280(4) 0.0723(9) 0.5000 0.086(13) Uiso 0.50 2 d SPD . . 
O8 O 0.04289(3) 0.04289(3) 0.30811(9) 0.0371(3) Uani 1 2 d SD . . 
H81 H 0.0314(8) 0.0748(5) 0.2617(11) 0.060(8) Uiso 0.50 1 d PD . . 
H82 H 0.0128(3) 0.0128(3) 0.313(2) 0.077(12) Uiso 0.50 2 d SPD . . 
H83 H 0.0463(12) 0.0463(12) 0.3882(8) 0.116 Uiso 0.50 2 d SPD . . 
O9 O -0.10572(3) 0.10572(3) 0.11231(9) 0.0360(3) Uani 1 2 d SD . . 
H91 H -0.1108(10) 0.0664(4) 0.1390(16) 0.074(9) Uiso 0.50 1 d PD . . 
H92 H -0.1068(7) 0.1068(7) 0.0321(7) 0.041(9) Uiso 0.50 2 d SPD . . 
H93 H -0.1350(3) 0.1350(3) 0.128(2) 0.051(10) Uiso 0.50 2 d SPD . . 
O10 O 0.15716(5) 0.07269(5) 0.0000 0.0380(3) Uani 1 2 d SD . . 
H101 H 0.1262(5) 0.1017(6) 0.0000 0.075(12) Uiso 0.50 2 d SPD . . 
H102 H 0.1990(4) 0.0774(17) 0.0000 0.106(16) Uiso 0.50 2 d SPD . . 
H103 H 0.1515(8) 0.0461(5) -0.0632(9) 0.046(6) Uiso 0.50 1 d PD . . 
O11 O 0.26700(3) 0.49192(3) 0.19330(6) 0.0380(2) Uani 1 1 d D . . 
H111 H 0.2671(12) 0.4500(4) 0.195(2) 0.093(10) Uiso 0.50 1 d PD . . 
H112 H 0.2339(5) 0.5081(8) 0.2304(15) 0.090(9) Uiso 0.50 1 d PD . . 
H113 H 0.3026(4) 0.4926(10) 0.2382(12) 0.051(7) Uiso 0.50 1 d PD . . 
H114 H 0.2758(9) 0.5127(6) 0.1254(9) 0.060(8) Uiso 0.50 1 d PD . . 
O12 O 0.22304(5) 0.30998(5) 0.0000 0.0370(3) Uani 1 2 d SD . . 
H121 H 0.1811(4) 0.3059(14) 0.0000 0.062(11) Uiso 0.50 2 d SPD . . 
H122 H 0.2554(5) 0.2823(6) 0.0000 0.054(10) Uiso 0.50 2 d SPD . . 
H123 H 0.2259(12) 0.3282(7) -0.0724(8) 0.101(11) Uiso 0.50 1 d PD . . 
O13 O 0.37435(3) 0.23529(3) 0.19474(6) 0.0380(2) Uani 1 1 d D . . 
H131 H 0.3660(9) 0.1964(4) 0.2212(15) 0.057 Uiso 0.50 1 d PD . . 
H132 H 0.3564(7) 0.2684(5) 0.2339(14) 0.082(9) Uiso 0.50 1 d PD . . 
H133 H 0.4167(4) 0.2392(10) 0.184(2) 0.066(8) Uiso 0.50 1 d PD . . 
H134 H 0.3553(7) 0.2347(12) 0.1222(8) 0.098 Uiso 0.50 1 d PD . . 
O14 O 0.59733(3) 0.02672(3) 0.11767(6) 0.0411(3) Uani 1 1 d D . . 
H141 H 0.6241(5) -0.0016(5) 0.1489(15) 0.068(8) Uiso 0.50 1 d PD . . 
H142 H 0.5600(4) 0.0214(10) 0.1547(14) 0.074(9) Uiso 0.50 1 d PD . . 
H143 H 0.5950(14) 0.0142(10) 0.0407(8) 0.160(15) Uiso 0.50 1 d PD . . 
H144 H 0.6076(10) 0.0675(4) 0.134(2) 0.093(10) Uiso 0.50 1 d PD . . 
O15 O 0.76105(5) 0.23895(5) 0.0000 0.0371(5) Uani 1 4 d SD . . 
H151 H 0.7196(4) 0.2308(10) 0.0000 0.033(8) Uiso 0.50 2 d SPD . . 
H152 H 0.7771(5) 0.2229(5) -0.0682(9) 0.049(10) Uiso 0.50 2 d SPD . . 
O16 O 0.81452(3) 0.18548(3) 0.17945(9) 0.0384(3) Uani 1 2 d SD . . 
H161 H 0.8444(3) 0.1556(3) 0.167(3) 0.080(13) Uiso 0.50 2 d SPD . . 
H162 H 0.7917(4) 0.2083(4) 0.1273(12) 0.094(14) Uiso 0.50 2 d SPD . . 
H163 H 0.8307(8) 0.2134(6) 0.2308(12) 0.142(15) Uiso 0.50 1 d PD . . 
O17 O 0.0000 0.5000 0.2500 0.0414(5) Uani 1 4 d SD . . 
H171 H -0.0023(16) 0.4623(4) 0.2150(15) 0.101(11) Uiso 0.50 1 d PD . . 
 
loop_ 
 _atom_site_aniso_label 
 _atom_site_aniso_U_11 
 _atom_site_aniso_U_22 
 _atom_site_aniso_U_33 
 _atom_site_aniso_U_23 
 _atom_site_aniso_U_13 
 _atom_site_aniso_U_12 
Br1A 0.0174(3) 0.0289(4) 0.0434(4) 0.0052(3) -0.0074(3) -0.0013(3) 
Br1B 0.0174(3) 0.0289(4) 0.0434(4) 0.0052(3) -0.0074(3) -0.0013(3) 
Br2A 0.0322(4) 0.0261(4) 0.0456(3) 0.0098(3) -0.0066(4) -0.0027(2) 
Br2B 0.0322(4) 0.0261(4) 0.0456(3) 0.0098(3) -0.0066(4) -0.0027(2) 
Br3A 0.0359(4) 0.0302(4) 0.0308(3) 0.0011(3) -0.0004(3) -0.0109(3) 
Br3B 0.0359(4) 0.0302(4) 0.0308(3) 0.0011(3) -0.0004(3) -0.0109(3) 
Br4A 0.0276(12) 0.0667(16) 0.0589(13) 0.0131(11) 0.0188(10) -0.0027(11) 
Br4B 0.0276(12) 0.0667(16) 0.0589(13) 0.0131(11) 0.0188(10) -0.0027(11) 
Br5A 0.184(3) 0.0766(16) 0.161(3) -0.035(2) 0.019(4) -0.0785(15) 
Br5B 0.184(3) 0.0766(16) 0.161(3) -0.035(2) 0.019(4) -0.0785(15) 
Br7A 0.0302(10) 0.0595(12) 0.0494(11) 0.0230(9) -0.0001(9) -0.0195(9) 
Br7B 0.0302(10) 0.0595(12) 0.0494(11) 0.0230(9) -0.0001(9) -0.0195(9) 
Br1C 0.0449(13) 0.0454(13) 0.052(2) -0.0151(10) 0.0123(10) -0.0282(10) 
Br1D 0.0449(13) 0.0454(13) 0.052(2) -0.0151(10) 0.0123(10) -0.0282(10) 
Br2C 0.0223(7) 0.0393(7) 0.0267(6) -0.0102(6) -0.0091(6) 0.0138(6) 
Br2D 0.0223(7) 0.0393(7) 0.0267(6) -0.0102(6) -0.0091(6) 0.0138(6) 
Br3C 0.0439(7) 0.0375(14) 0.0399(6) -0.0045(5) -0.0048(8) 0.0097(8) 
Br3D 0.0439(7) 0.0375(14) 0.0399(6) -0.0045(5) -0.0048(8) 0.0097(8) 
Br4C 0.0196(9) 0.0528(11) 0.0602(11) 0.0405(9) -0.0109(8) -0.0212(8) 
Br4D 0.0196(9) 0.0528(11) 0.0602(11) 0.0405(9) -0.0109(8) -0.0212(8) 
Br5C 0.0332(7) 0.0344(8) 0.0409(7) 0.0183(6) -0.0205(6) -0.0170(6) 
Br5D 0.0332(7) 0.0344(8) 0.0409(7) 0.0183(6) -0.0205(6) -0.0170(6) 
Br6C 0.0818(7) 0.0376(5) 0.0170(7) 0.0001(5) -0.0004(6) -0.0065(5) 
Br6D 0.0818(7) 0.0376(5) 0.0170(7) 0.0001(5) -0.0004(6) -0.0065(5) 
Br7C 0.0492(11) 0.0280(9) 0.0413(10) -0.0012(7) 0.0110(8) 0.0214(8) 
Br7D 0.0492(11) 0.0280(9) 0.0413(10) -0.0012(7) 0.0110(8) 0.0214(8) 
Br8C 0.0299(8) 0.0404(9) 0.0610(9) 0.0163(7) -0.0310(7) -0.0060(7) 
Br8D 0.0299(8) 0.0404(9) 0.0610(9) 0.0163(7) -0.0310(7) -0.0060(7) 
Br1E 0.0374(7) 0.0442(7) 0.0271(9) 0.0089(6) 0.0081(5) 0.0112(5) 
Br1F 0.0374(7) 0.0442(7) 0.0271(9) 0.0089(6) 0.0081(5) 0.0112(5) 
Br2E 0.0319(15) 0.0202(14) 0.0460(11) 0.0031(8) 0.0031(9) 0.0173(11) 
Br2F 0.0319(15) 0.0202(14) 0.0460(11) 0.0031(8) 0.0031(9) 0.0173(11) 
Br3E 0.0399(16) 0.0383(16) 0.030(2) -0.0002(13) -0.0099(13) -0.0032(12) 
Br3F 0.0399(16) 0.0383(16) 0.030(2) -0.0002(13) -0.0099(13) -0.0032(12) 
Br4E 0.0361(15) 0.0358(15) 0.0435(12) -0.0047(14) -0.0012(14) -0.0077(10) 
Br4F 0.0361(15) 0.0358(15) 0.0435(12) -0.0047(14) -0.0012(14) -0.0077(10) 
Br6E 0.0487(10) 0.0502(10) 0.0613(14) 0.0032(7) -0.0073(7) -0.0155(8) 
Br6F 0.0487(10) 0.0502(10) 0.0613(14) 0.0032(7) -0.0073(7) -0.0155(8) 
Br7E 0.0465(13) 0.0371(12) 0.0350(13) -0.0272(8) -0.0056(9) -0.0100(10) 
Br7F 0.0465(13) 0.0371(12) 0.0350(13) -0.0272(8) -0.0056(9) -0.0100(10) 
O1 0.0348(6) 0.0427(7) 0.0376(6) 0.000 0.000 -0.0017(5) 
O2 0.0375(4) 0.0411(4) 0.0405(5) 0.0013(4) -0.0001(4) -0.0016(4) 
O3 0.0377(4) 0.0400(4) 0.0382(4) -0.0004(4) 0.0002(4) -0.0029(4) 
O4 0.0369(6) 0.0391(7) 0.0362(6) 0.000 0.000 0.0027(5) 
O5 0.0413(7) 0.0324(6) 0.0393(6) 0.000 0.000 0.0006(5) 
O6 0.0388(4) 0.0389(4) 0.0380(4) -0.0031(4) -0.0016(4) 0.0019(4) 
O7 0.0420(6) 0.0420(6) 0.0370(9) 0.000 0.000 -0.0009(8) 
O8 0.0387(4) 0.0387(4) 0.0338(6) 0.0000(4) 0.0000(4) -0.0012(5) 
O9 0.0362(4) 0.0362(4) 0.0357(6) 0.0010(4) -0.0010(4) 0.0033(5) 
O10 0.0382(6) 0.0382(6) 0.0376(6) 0.000 0.000 0.0011(5) 
O11 0.0387(4) 0.0388(4) 0.0363(4) 0.0029(4) 0.0003(4) -0.0001(4) 
O12 0.0369(6) 0.0407(7) 0.0335(6) 0.000 0.000 0.0005(5) 
O13 0.0376(4) 0.0393(4) 0.0372(4) -0.0007(4) -0.0017(4) -0.0008(4) 
O14 0.0404(5) 0.0412(5) 0.0418(5) 0.0009(4) 0.0009(4) 0.0004(4) 
O15 0.0389(6) 0.0389(6) 0.0337(9) 0.000 0.000 -0.0012(8) 
O16 0.0392(4) 0.0392(4) 0.0369(6) -0.0001(4) 0.0001(4) 0.0021(5) 
O17 0.0390(5) 0.0390(5) 0.0462(10) 0.000 0.000 0.000 
 
_geom_special_details 
; 
 All esds (except the esd in the dihedral angle between two l.s. planes) 
 are estimated using the full covariance matrix.  The cell esds are taken 
 into account individually in the estimation of esds in distances, angles 
 and torsion angles; correlations between esds in cell parameters are only 
 used when they are defined by crystal symmetry.  An approximate (isotropic) 
 treatment of cell esds is used for estimating esds involving l.s. planes. 
; 
 
loop_ 
 _geom_bond_atom_site_label_1 
 _geom_bond_atom_site_label_2 
 _geom_bond_distance 
 _geom_bond_site_symmetry_2 
 _geom_bond_publ_flag 
Br1A Br1B 2.2758(14) . ? 
Br2A Br2B 2.2737(12) . ? 
Br3A Br3B 2.2755(14) . ? 
Br4A Br4B 2.277(4) . ? 
Br5A Br5B 2.280(4) . ? 
Br7A Br7B 2.278(4) . ? 
Br1C Br1D 2.273(4) . ? 
Br2C Br2D 2.269(3) . ? 
Br3C Br3D 2.268(3) . ? 
Br4C Br4D 2.275(3) . ? 
Br5C Br5D 2.271(3) . ? 
Br6C Br6D 2.2757(18) . ? 
Br7C Br7D 2.277(3) . ? 
Br8C Br8D 2.271(3) . ? 
Br1E Br1F 2.276(2) . ? 
Br2E Br2F 2.270(3) . ? 
Br3E Br3F 2.283(5) . ? 
Br4E Br4F 2.272(4) . ? 
Br6E Br6F 2.284(3) . ? 
Br7E Br7F 2.271(4) . ? 
 
loop_ 
 _geom_angle_atom_site_label_1 
 _geom_angle_atom_site_label_2 
 _geom_angle_atom_site_label_3 
 _geom_angle 
 _geom_angle_site_symmetry_1 
 _geom_angle_site_symmetry_3 
 _geom_angle_publ_flag 
 
_diffrn_measured_fraction_theta_max    1.000 
_diffrn_reflns_theta_full              23.30 
_diffrn_measured_fraction_theta_full   1.000 
_refine_diff_density_max    0.201 
_refine_diff_density_min   -0.166 
_refine_diff_density_rms    0.039 
